# Supplementary material
Source: PubMed Central journal article supplement (PMC6368973)
Supplement: NIHMS1010468-supplement-Supporting_Figure_1.pdf [file NIHMS1010468-supplement-Supporting_Figure_1.pdf]

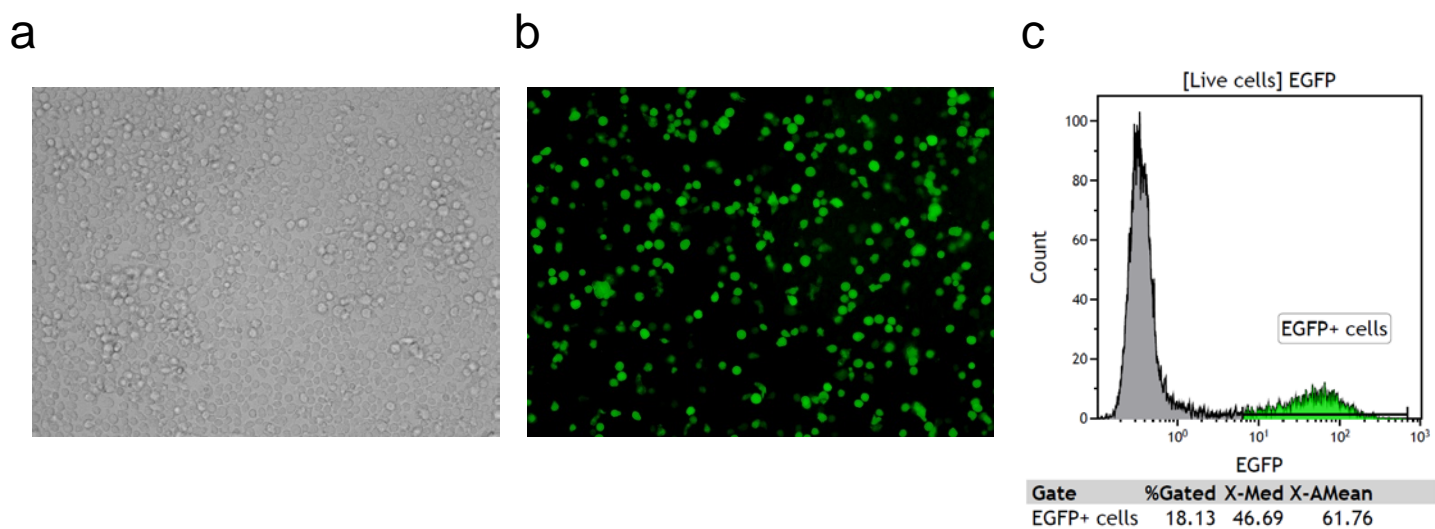

**Figure S1.** Fluorescence microscopy and flow cytometry of FV-EGW-A1 exposed cord blood cells 10 days post-transduction. **(a)** Cells viewed via bright field. **(b)** Cells viewed via fluorescence microscopy. **(c)** EGFP quantified via flow cytometry. EGFP is enhanced green fluorescent protein; X-AMean is mean fluorescence intensity.
